# Supplementary material for: Pharmacologic Management of Chronic Obstructive Pulmonary Disease. An Official American Thoracic Society Clinical Practice Guideline
Source: PubMed Central journal article supplement — Am J Respir Crit Care Med. 2020 May 1;201(9):e56–69. doi: 10.1164/rccm.202003-0625ST (PMC7193862; doi:10.1164/rccm.202003-0625st), 2020-05-01
Supplement: rccm.202003-0625ST_executive_summary.pdf [file rccm.202003-0625ST_executive_summary.pdf]

# AMERICAN THORACIC SOCIETY DOCUMENTS

## Pharmacologic Management of Chronic Obstructive Pulmonary Disease

### An Official American Thoracic Society Clinical Practice Guideline: Executive Summary

⑧ Linda Nici, Manoj J. Mammen, Edward Charbek, Paul E. Alexander, David H. Au, Cynthia M. Boyd, Gerard J. Criner, Gavin C. Donaldson, Michael Dreher, Vincent S. Fan, Andrea S. Gershon, MeiLan K. Han, Jerry A. Krishnan, Fernando J. Martinez, Paula M. Meek, Michael Morgan, Michael I. Polkey, Milo A. Puhan, Mohsen Sadatsafavi, Don D. Sin, George R. Washko, Jadwiga A. Wedzicha, and Shawn D. Aaron; on behalf of the American Thoracic Society Assembly on Clinical Problems

THIS OFFICIAL CLINICAL PRACTICE GUIDELINE WAS APPROVED BY THE AMERICAN THORACIC SOCIETY FEBRUARY 2020

**Background:** This document provides clinical recommendations for the pharmacologic treatment of chronic obstructive pulmonary disease (COPD). It represents a collaborative effort on the part of a panel of expert COPD clinicians and researchers along with a team of methodologists under the guidance of the American Thoracic Society.

**Methods:** Comprehensive evidence syntheses were performed on all relevant studies that addressed the clinical questions and critical patient-centered outcomes agreed upon by the panel of experts. The evidence was appraised, rated, and graded, and recommendations were formulated using the Grading of Recommendations, Assessment, Development, and Evaluation approach.

**Results:** After weighing the quality of evidence and balancing the desirable and undesirable effects, the guideline panel made the following recommendations: 1) a strong recommendation for the use of long-acting  $\beta_2$ -agonist (LABA)/long-acting muscarinic antagonist (LAMA) combination therapy over LABA or LAMA monotherapy in patients with COPD and dyspnea or exercise intolerance; 2) a conditional recommendation for the use of triple therapy with inhaled corticosteroids (ICS)/LABA/LAMA over dual therapy with LABA/LAMA in patients with COPD and dyspnea or exercise intolerance who have experienced one or more exacerbations in the past

year; 3) a conditional recommendation for ICS withdrawal for patients with COPD receiving triple therapy (ICS/LABA/LAMA) if the patient has had no exacerbations in the past year; 4) no recommendation for or against ICS as an additive therapy to long-acting bronchodilators in patients with COPD and blood eosinophilia, except for those patients with a history of one or more exacerbations in the past year requiring antibiotics or oral steroids or hospitalization, for whom ICS is conditionally recommended as an additive therapy; 5) a conditional recommendation against the use of maintenance oral corticosteroids in patients with COPD and a history of severe and frequent exacerbations; and 6) a conditional recommendation for opioid-based therapy in patients with COPD who experience advanced refractory dyspnea despite otherwise optimal therapy.

**Conclusions:** The task force made recommendations regarding the pharmacologic treatment of COPD based on currently available evidence. Additional research in populations that are underrepresented in clinical trials is needed, including studies in patients with COPD 80 years of age and older, those with multiple chronic health conditions, and those with a codiagnosis of COPD and asthma.

**Keywords:** COPD; exacerbation; dyspnea; steroids; pharmacotherapy

---

This Executive Summary is part of the full official ATS guideline, which readers may access online at <http://www.atsjournals.org/doi/abs/10.1164/rccm.202003-0625ST>. Only the Executive Summary is appearing in the print edition of the *Journal*. The article of record, and the one that should be cited, is: Pharmacologic Management of Chronic Obstructive Pulmonary Disease: An Official American Thoracic Society Clinical Practice Guideline. *Am J Respir Crit Care Med* 2020;201:e56–e69.

⑧ You may print one copy of this document at no charge. However, if you require more than one copy, you must place a reprint order. Domestic reprint orders: amy.schrivner@sheridan.com; international reprint orders: louisamott@springer.com.

ORCID IDs: 0000-0003-0343-3234 (M.J.M.); 0000-0003-3221-8875 (P.E.A.); 0000-0002-5538-4190 (G.C.D.); 0000-0002-0246-594X (A.S.G.); 0000-0003-1243-8571 (M.I.P.); 0000-0002-0419-7862 (M.S.); 0000-0002-4762-3542 (S.D.A.).

Correspondence and requests for reprints should be addressed to Shawn D. Aaron, M.D., The Ottawa Hospital, General Campus, 501 Smyth Road, Ottawa, ON, K1H 8L6 Canada. E-mail: saaron@ohri.ca.

This document has a related editorial.

This document has an online supplement, which is accessible from this issue's table of contents at [www.atsjournals.org](http://www.atsjournals.org).

*Am J Respir Crit Care Med* Vol 201, Iss 9, pp 1039–1049, May 1, 2020

Copyright © 2020 by the American Thoracic Society

Originally Published in Press as DOI: 10.1164/rccm.202003-0625ST on April 13, 2020

Internet address: [www.atsjournals.org](http://www.atsjournals.org)

## Contents

Summary of Recommendations

Introduction

Recommendations

Methods

Results

**Question 1: In Patients with COPD Who Complain of Dyspnea or Exercise Intolerance, Is LABA/LAMA Combination Therapy More Effective than and as Safe as LABA or LAMA Monotherapy?**

**Question 2: In Patients with COPD Who Complain of Dyspnea or Exercise Intolerance despite the Use of Dual Therapy with**

**LABA/LAMA, Is Triple Therapy with ICS/LABA/LAMA More Effective than and as Safe as Dual Therapy with LABA/LAMA?**

**Question 3: In Patients with COPD Who Are Receiving Triple Therapy (ICS/LABA/LAMA), Should the ICS Be Withdrawn?**

**Question 4: In Patients with COPD and Blood Eosinophilia, Should Treatment Include an ICS in Addition to a Long-Acting Bronchodilator?**

**Question 5: In Patients with COPD Who Have a History of Severe**

**and Frequent Exacerbations despite Otherwise Optimal Therapy, Is Maintenance Oral Steroid Therapy More Effective than and as Safe as No Maintenance Oral Steroid Therapy?**

**Question 6: In Patients with COPD Who Experience Advanced Refractory Dyspnea despite Otherwise Optimal Therapy, Is Opioid-based Therapy More Effective than and as Safe as No Additional Therapy?**

Conclusions

## Summary of Recommendations

In patients with chronic obstructive pulmonary disease (COPD) who complain of dyspnea or exercise intolerance, we recommend long-acting  $\beta_2$ -agonist (LABA)/long-acting muscarinic antagonist (LAMA) combination therapy over LABA or LAMA monotherapy (strong recommendation, moderate certainty evidence).

In patients with COPD who complain of dyspnea or exercise intolerance despite dual therapy with LABA/LAMA, we suggest the use of triple therapy with inhaled corticosteroids (ICS)/LABA/LAMA over dual therapy with LABA/LAMA in those patients with a history of one or more exacerbations in the past year requiring antibiotics or oral steroids or hospitalization (conditional recommendation, moderate certainty evidence).

In patients with COPD who are receiving triple therapy (ICS/LABA/LAMA), we suggest that the ICS can be withdrawn if the patient has had no exacerbations in the past year (conditional recommendation, moderate certainty evidence).

We do not make a recommendation for or against ICS as an additive therapy to long-acting bronchodilators in patients with COPD and blood eosinophilia, except for those patients with a history of one or more exacerbations in the past year requiring antibiotics or oral steroids or hospitalization, for whom we suggest

ICS as an additive therapy (conditional recommendation, moderate certainty evidence).

In patients with COPD and a history of severe and frequent exacerbations despite otherwise optimal therapy, we advise against the use of maintenance oral corticosteroid therapy (conditional recommendation, low certainty evidence).

In individuals with COPD who experience advanced refractory dyspnea despite otherwise optimal therapy, we suggest that opioid-based therapy be considered for dyspnea management, within a personalized shared decision-making approach (conditional recommendation, very low certainty evidence).

## Introduction

The Global Initiative for Chronic Obstructive Lung Disease 2019 report defines COPD as a “common, preventable and treatable disease that is characterized by persistent respiratory symptoms and airflow limitation that is due to airway or alveolar abnormalities, usually caused by significant exposure to noxious particles or gases” (1). Pharmacologic treatment for COPD aims to improve quality of life (QOL) and control symptoms while reducing the frequency of exacerbations.

The purpose of this clinical practice guideline is to address specific clinically important questions regarding the pharmacologic management of COPD. The expert panel, in collaboration with a team of

methodologists, prioritized and developed six questions that addressed significant COPD management issues. The panel used the Grading of Recommendations, Assessment, Development, and Evaluation (GRADE) approach (*see* Table 1) (2, 3) to develop clinical recommendations.

The target audience for this guideline includes specialists in respiratory medicine. However, primary care physicians, internists, other healthcare professionals, patients, and policy makers may also find benefit from these recommendations. Although the panel used a systematic approach and the best available evidence to develop this guideline, it is important to note that study participants in many clinical trials may not reflect all populations. Specifically, patients older than 80 years, those with multiple chronic conditions, and those with a codiagnosis of COPD and asthma are rarely represented in clinical trials. We recommend that for all clinical management decisions, the patient and the healthcare provider should engage in a shared decision-making process.

## Methods

The methodology applied in the development of this document with regard to formulating questions, rating the important outcomes, selecting studies, and synthesizing, formulating, and grading the evidence is described in detail in the online supplement. For all outcomes reporting standardized mean differences (SMDs), we used a default threshold of 0.50 for the SMD

point estimate to describe a meaningful clinically important difference (MCID) (4). A summary of the recommendations can be found in Table 2.

**Results**

**Question 1: In Patients with COPD Who Complain of Dyspnea or Exercise Intolerance, Is LABA/LAMA Combination Therapy More Effective than and as Safe as LABA or LAMA Monotherapy?**

**Recommendation.** For patients with COPD who complain of dyspnea or exercise intolerance, we recommend LABA/LAMA combination therapy over LABA or LAMA monotherapy (strong recommendation, moderate certainty evidence).

**Critical outcomes.** Outcome prioritization by the panel resulted in ranking hospital admissions, dyspnea, exacerbations, health-related QOL, and treatment-related adverse events as critical outcomes.

**Summary of the evidence.** The screeners identified 24 RCTs for final review inclusion (N = 45,411) (5–28).

**Dyspnea score: Transition Dyspnea Index or COPD Assessment Test.** Eleven

studies (n = 17,650) assessed dyspnea (5, 6, 10, 15, 17, 19, 20, 22, 25–27). The panel acknowledged that the COPD Assessment Test provides a broader estimate of health status; however, one of its core components is dyspnea. The studies revealed an increased score (less breathlessness) in patients randomized to dual LABA/LAMA therapy versus monotherapy (SMD = 0.10; 95% confidence interval [CI], 0.07–0.13; P < 0.001), although this does not reach the MCID threshold.

**Exacerbations.** Fifteen studies (n = 22,733) assessed exacerbation risk (5, 6, 9, 10, 12–14, 17, 19–23, 26, 27). The studies revealed a reduced risk with the dual LABA/LAMA therapy versus monotherapy (risk ratio [RR], 0.80; 95% CI, 0.69–0.92; P = 0.002). There was moderate certainty in estimates of effect based on GRADE (absolute risk effect was 88 fewer per 1,000 patients; 95% CI, 136 fewer to 35 fewer).

**Health-related QOL: Chronic Respiratory Disease Questionnaire or St. George’s Respiratory Questionnaire.** Eleven studies (n = 18,897) assessed health-related QOL (5, 10, 11, 14–18, 22, 24, 25). The studies revealed a reduced score (improved QOL) favoring dual LABA/LAMA therapy versus monotherapy (SMD = –0.13; 95% CI, –0.16 to –0.10;

P < 0.001), although this does not reach the MCID threshold.

**Hospital admissions.** Three studies (n = 9,719) assessed risk of hospital admission (10, 19, 26). The studies revealed a reduced risk with dual LABA/LAMA therapy versus monotherapy (RR, 0.89; 95% CI, 0.82–0.97; P = 0.01) There was high certainty in estimates of effect based on GRADE (absolute risk effect was 19 fewer hospital admissions per 1,000 patients treated with LABA/LAMA as opposed to monotherapy; 95% CI, 32 fewer to 5 fewer).

**Treatment-related adverse events.** Twenty-three studies (n = 38,758) assessed treatment-related adverse events (5–17, 19–28). The studies revealed no significant difference in risk of treatment-related adverse events with dual LABA/LAMA therapy versus monotherapy (RR, 0.99; 95% CI, 0.97–1.01; P = 0.34).

**Summary.** Based on the five critical outcomes and completion of the GRADE evidence table, the overall certainty of evidence was judged to be “moderate.”

**Committee discussion.** The panel noted a statistically significant decrease in exacerbations and hospital admissions in patients receiving dual therapy as opposed to monotherapy. The evidence also showed statistically significant improvements in dyspnea and QOL with dual therapy, although these did not reach the MCID

**Table 1.** Implications of Strong and Conditional Recommendations: From the Grading of Recommendations, Assessment, Development and Evaluation Working Group

|                   | <b>Strong Recommendation (“We recommend . . .”)</b>                                                                                                                                                                                                                                                                                                                                                                                   | <b>Conditional Recommendation (“We suggest . . .”)</b>                                                                                                                                                                                                                                                                                                                                                                                                            |
|-------------------|---------------------------------------------------------------------------------------------------------------------------------------------------------------------------------------------------------------------------------------------------------------------------------------------------------------------------------------------------------------------------------------------------------------------------------------|-------------------------------------------------------------------------------------------------------------------------------------------------------------------------------------------------------------------------------------------------------------------------------------------------------------------------------------------------------------------------------------------------------------------------------------------------------------------|
| For patients      | The overwhelming majority of individuals in this situation would want the recommended course of action, and only a small minority would not. <i>(It is the right course of action for &gt;95% of patients.)</i>                                                                                                                                                                                                                       | The majority of individuals in this situation would want the suggested course of action, but a sizable minority would not. <i>(It is the right course of action for &gt;50% of patients.)</i>                                                                                                                                                                                                                                                                     |
| For clinicians    | The overwhelming majority of individuals should receive the recommended course of action. Adherence to this recommendation according to the guideline could be used as a quality criterion or performance indicator. Formal decision aids are not likely to be needed to help individuals make decisions consistent with their values and preferences. <i>(It is reasonable to recommend it strongly to patients and caregivers.)</i> | Different choices will be appropriate for different patients, and the clinician must help each patient arrive at a management decision consistent with her or his values and preferences. Decision aids may be useful to help individuals make decisions consistent with their values and preferences. Clinicians should expect to spend more time with patients when working toward a decision. <i>(Slow down, think about it, discuss it with the patient.)</i> |
| For policy makers | The recommendation can be adopted as policy in most situations, including for use as a performance indicator. <i>(The recommended course of action may be an appropriate performance measure.)</i>                                                                                                                                                                                                                                    | Policy making will require substantial debates and involvement of many stakeholders. Policies are also more likely to vary between regions. Performance indicators would have to focus on the fact that adequate deliberation about the management options has taken place. <i>(The recommended course of action is not appropriate for a performance measure.)</i>                                                                                               |

threshold. In addition, the available studies did not reveal any evidence of harm with dual therapy compared with monotherapy. Given the above evidence, we believe that patients would thus opt for dual therapy over monotherapy.

**Question 2: In Patients with COPD Who Complain of Dyspnea or Exercise Intolerance despite the Use of Dual Therapy with LABA/LAMA, Is Triple Therapy with ICS/LABA/LAMA More Effective than and as Safe as Dual Therapy with LABA/LAMA?**

**Recommendation.** In patients with COPD who complain of dyspnea or exercise intolerance despite dual therapy with LABA/LAMA, we suggest the use of triple therapy with ICS/LABA/LAMA over dual therapy with LABA/LAMA in those patients with a history of one or more exacerbations in the past year requiring antibiotics or oral steroids or hospitalization (conditional recommendation, moderate certainty evidence).

**Critical outcomes.** Outcome prioritization by the panel resulted in ranking pneumonia, hospital admissions, exacerbations, ICU admissions, dyspnea, and health-related QOL as critical outcomes.

**Subgroup analysis.** A subgroup analysis was done based on patients with a history of one or more COPD exacerbations in the past year requiring treatment with antibiotics or oral steroids or hospitalization versus patients with zero to less than one exacerbation in the past year requiring treatment with antibiotics or oral steroids or hospitalization.

**Summary of the evidence.** The screeners identified four RCTs for final review inclusion ( $n = 9,313$ ). Three of the four studies enrolled patients with a history of one or more exacerbations per year (19, 29, 30). In one study, patients were not required to have had an exacerbation in the past year (31).

**Pneumonia.** Three studies ( $n = 8,964$ ) assessed incidence of pneumonia (29–31). The studies revealed a significantly increased risk of pneumonia with triple therapy as compared with dual therapy (rate ratio, 1.39; 95% CI, 1.02–1.90;  $P = 0.03$ ). There was a high certainty in estimates of effect based on GRADE (absolute risk effect was 15 more

pneumonias per 1,000 patients; 95% CI, 1 more to 35 more). The  $\chi^2$  interaction test suggested similar effects in frequency of pneumonia for those with a history of one or more exacerbations in the past year and those with zero to less than one exacerbation in the past year ( $P = 0.74$ ).

**Hospital admissions.** One study ( $n = 293$ ) evaluated the risk of all-cause hospital admissions (19). The study revealed no significant difference in risk of hospital admission with triple therapy as compared with dual therapy (rate ratio, 0.87; 95% CI, 0.62–1.24;  $P = 0.44$ ). There was moderate certainty in estimates of effect based on GRADE (absolute risk effect was 42 fewer per 1,000 patients; 95% CI, 123 fewer to 78 more). There were no subgroups available to analyze.

**Exacerbations.** Four studies ( $n = 9,257$ ) evaluated the risk of COPD exacerbations (19, 29–31). The studies revealed a significantly decreased risk of exacerbations with triple therapy as compared with dual therapy with LABA/LAMA (rate ratio, 0.71; 95% CI, 0.59–0.86;  $P < 0.001$ ). There was moderate certainty in estimates of effect based on GRADE (absolute risk effect was 64 fewer exacerbations per 1,000 patients; 95% CI, 90 fewer to 31 fewer). The  $\chi^2$  interaction test suggested different effects in frequency of exacerbations for those with a history of one or more exacerbations in the past year and those with zero to less than one exacerbation in the past year ( $P < 0.001$ ).

**Subgroup with a history of one or more exacerbations in the past year.** Three studies ( $n = 7,993$ ) evaluated the risk of COPD exacerbations in subjects with a history of one or more exacerbations in the past year (19, 29, 30). The studies revealed a significantly decreased risk of exacerbations with triple therapy as compared with dual therapy with LABA/LAMA (rate ratio, 0.77; 95% CI, 0.72–0.81;  $P < 0.001$ ). Assuming a baseline risk of COPD exacerbation in this subgroup of 1.0 exacerbations per patient per year, the absolute risk effect was 230 fewer exacerbations per 1,000 patients (95% CI, 280 fewer to 190 fewer).

**Subgroup with zero to less than one exacerbation in the past year.** One study ( $n = 1,264$ ) revealed a significant reduction in the rate of exacerbations with triple therapy as compared with dual therapy with LABA/LAMA (rate ratio, 0.48; 95% CI, 0.37–0.62;  $P < 0.001$ ) (31). Assuming a

baseline risk of COPD exacerbation in this subgroup of 0.35 exacerbations per patient per year, the absolute risk difference/risk effect was 182 fewer exacerbations per 1,000 patients (95% CI, 220 fewer to 133 fewer).

**ICU admissions.** ICU admissions were not reported.

**Dyspnea score: Transition Dyspnea Index.** Two studies ( $n = 1,494$ ) assessed dyspnea (19, 31). The studies revealed no significant change in dyspnea in patients treated with triple therapy as compared with dual therapy (MD = 0.20; 95% CI, –0.04 to 0.44;  $P = 0.11$ ), and this does not reach the MCID threshold of 1 Transition Dyspnea Index (TDI) unit. The  $\chi^2$  interaction test suggested similar effects for subjects with and without exacerbations ( $P = 0.58$ ).

**Health-related QOL: St. George's Respiratory Questionnaire.** Three studies ( $n = 6,292$ ) assessed QOL (29, 31). The studies revealed a significantly lower score (improved QOL) favoring triple therapy over dual therapy (MD = –1.56; 95% CI, –2.39 to –0.74;  $P < 0.001$ ); however, this does not exceed the MCID threshold for a St. George's Respiratory Questionnaire (SGRQ) score of –4 units. The  $\chi^2$  interaction test suggested similar effects in QOL for subjects with and without exacerbations ( $P = 0.81$ ).

**Summary.** Based on the five critical outcomes and completion of the GRADE evidence table, the overall certainty of evidence was judged to be “moderate.”

**Committee discussion.** The panel concluded that the benefits of triple therapy with ICS/LABA/LAMA outweigh the risks as compared with treatment with LABA/LAMA dual therapy in patients with COPD who complain of dyspnea or exercise intolerance despite dual therapy and have experienced one or more exacerbations in the past year. The panel noted that in three studies that randomized symptomatic patients with COPD and a history of exacerbations, the benefits of triple therapy in protecting against the risk of future exacerbations outweighed the increased risk of pneumonia. In these patients, the 23% rate reduction in exacerbations was believed to outweigh the 39% increased rate of pneumonia, as exacerbation events are much more common than pneumonia events in these patients. This was confirmed when the absolute risk differences were examined. Patients treated

**Table 2.** Population, Intervention, Comparator, and Outcomes Questions and Recommendations for the Pharmacologic Treatment of Stable Chronic Obstructive Pulmonary Disease

| PICO Question                                                                                                                                                                                                                   | Recommendation                                                                                                                                                                                                                                                                                                                                           | Strength of Recommendation | Certainty of Evidence |
|---------------------------------------------------------------------------------------------------------------------------------------------------------------------------------------------------------------------------------|----------------------------------------------------------------------------------------------------------------------------------------------------------------------------------------------------------------------------------------------------------------------------------------------------------------------------------------------------------|----------------------------|-----------------------|
| 1. In patients with COPD who complain of dyspnea or exercise intolerance, is LABA/LAMA combination therapy more effective than and as safe as LABA or LAMA monotherapy?                                                         | In patients with COPD who complain of dyspnea or exercise intolerance, we recommend LABA/LAMA combination therapy over LABA or LAMA monotherapy.                                                                                                                                                                                                         | Strong                     | Moderate certainty    |
| 2. In patients with COPD who complain of dyspnea or exercise intolerance despite the use of dual therapy with LABA/LAMA, is triple therapy with ICS/LABA/LAMA more effective than and as safe as dual therapy with LABA/LAMA?   | In patients with COPD who complain of dyspnea or exercise intolerance despite dual therapy with LABA/LAMA, we suggest the use of triple therapy with ICS/LABA/LAMA over dual therapy with LABA/LAMA in those patients with a history of one or more exacerbations in the past year requiring antibiotics or oral steroids or hospitalization.            | Conditional                | Moderate certainty    |
| 3. In patients with COPD who are receiving triple therapy (ICS/LABA/LAMA), should the ICS be withdrawn?                                                                                                                         | In patients with COPD who are receiving triple therapy (ICS/LABA/LAMA), we suggest that the ICS can be withdrawn if the patient has had no exacerbations in the past year.                                                                                                                                                                               | Conditional                | Moderate certainty    |
| 4. In patients with COPD and blood eosinophilia, should treatment include an ICS in addition to a long-acting bronchodilator?                                                                                                   | We do not make a recommendation for or against ICS as an additive therapy to long-acting bronchodilators in patients with COPD and blood eosinophilia, except for those patients with a history of one or more exacerbations in the past year requiring antibiotics or oral steroids or hospitalization, for whom we suggest ICS as an additive therapy. | Conditional                | Moderate certainty    |
| 5. In patients with COPD who have a history of severe and frequent exacerbations despite otherwise optimal therapy, is maintenance oral steroid therapy more effective than and as safe as no maintenance oral steroid therapy? | In patients with COPD and a history of severe and frequent exacerbations despite otherwise optimal therapy, we advise against the use of maintenance oral corticosteroid therapy.                                                                                                                                                                        | Conditional                | Low certainty         |
| 6. In patients with COPD who experience advanced refractory dyspnea despite otherwise optimal therapy, is opioid-based therapy more effective than and as safe as no additional therapy?                                        | In individuals with COPD who experience advanced refractory dyspnea despite otherwise optimal therapy, we suggest that opioid-based therapy be considered for dyspnea management, within a personalized shared decision-making approach.                                                                                                                 | Conditional                | Very low certainty    |

*Definition of abbreviations:* COPD=chronic obstructive pulmonary disease; ICS=inhaled corticosteroids; LABA=long-acting  $\beta_2$ -agonist; LAMA=long-acting muscarinic antagonist; PICO=Population, Intervention, Comparator, and Outcomes.

with triple therapy experienced 15 more pneumonias per 1,000 patients; however, they also experienced 230 fewer COPD exacerbations per 1,000 patients. Thus, the panel concluded that for patients with COPD and a history of exacerbations, the benefits of triple therapy outweigh the risks.

However, the panel concluded that the benefits of triple therapy do not clearly outweigh the risks as compared with treatment with dual therapy in patients with

COPD who have experienced zero to less than one exacerbation in the past year, because only one clinical trial was available that assessed this specific subgroup. In that study, these patients had a 39% increased relative risk of pneumonia and a 52% relative risk reduction in exacerbations. Patients treated with triple therapy experienced 15 more pneumonias per 1,000 patients, and 182 fewer COPD exacerbations per 1,000 patients. Although the data from this study suggest that these

patients may benefit from triple therapy, the panel believed that additional studies are needed before triple therapy can be recommended for this subgroup.

**Question 3: In Patients with COPD Who Are Taking Triple Therapy (ICS/LABA/LAMA), Should the ICS Be Withdrawn?**

**Recommendation.** In patients with COPD who are receiving triple therapy with

ICS/LABA/LAMA, we suggest that the ICS can be withdrawn if the patient has had no exacerbations in the past year (conditional recommendation, moderate certainty evidence).

**Subgroup analysis.** A subgroup analysis was done for the exacerbation outcome based on patients with a history of one or more COPD exacerbations in the past year requiring treatment with antibiotics or oral steroids or hospitalization versus patients with no exacerbation in the past year requiring treatment with antibiotics or oral steroids or hospitalization.

**Critical outcomes.** Outcome prioritization by the panel resulted in ranking pneumonia, hospital admissions, exacerbations, all-cause death, ICU admissions, dyspnea, health-related QOL, and physical activity as critical outcomes.

**Summary of the evidence.** The screeners identified three RCTs for final review inclusion; however, one of the three studies was a subgroup analysis (32) of a larger trial (33), and thus only two studies were included for review ( $n = 3,538$ ) (33, 34).

**Pneumonia.** Two studies ( $n = 3,538$ ) assessed incidence of pneumonia (33, 34). The studies revealed no significant difference in risk of pneumonia with withdrawal of ICS and subsequent dual therapy as compared with triple therapy (RR, 0.92; 95% CI, 0.67–1.25;  $P = 0.58$ ). There was moderate certainty in estimates of effect based on GRADE (absolute risk effect was 4 fewer pneumonias per 1,000 patients; 95% CI, 15 fewer to 11 more).

**Hospital admissions.** One study ( $n = 2,485$ ) evaluated hospital admissions (33). The study revealed no significant difference in hospital admission with withdrawal of ICS and subsequent dual therapy as compared with continued triple therapy (RR, 0.99; 95% CI, 0.86–1.15;  $P = 0.93$ ). There was moderate certainty in estimates of effect based on GRADE (absolute risk effect was 2 fewer admissions per 1,000 patients; 95% CI, 31 fewer to 33 more).

**Exacerbations.** Two studies ( $n = 3,538$ ) evaluated the risk of COPD exacerbations (33, 34). The studies revealed no significant difference in risk of exacerbations with withdrawal of ICS and subsequent dual therapy as compared with continued triple

therapy (rate ratio, 1.07; 95% CI, 0.97–1.17;  $P = 0.17$ ). There was moderate certainty in estimates of effect based on GRADE (absolute effect was 15 more exacerbation events per 1,000 patients; 95% CI, 7 fewer to 37 more). The  $\chi^2$  interaction test suggested similar effects for the risk of COPD exacerbations for those with one or more exacerbations in the past year and those without a history of exacerbations ( $P = 0.88$ ).

**All-cause mortality.** Two studies ( $n = 3,538$ ) evaluated all-cause mortality (33, 34). The studies revealed no significant difference in risk of death with withdrawal of ICS and subsequent dual therapy as compared with continued triple therapy (RR, 1.09; 95% CI, 0.73–1.65;  $P = 0.66$ ). There was moderate certainty in estimates of effect based on GRADE (absolute risk effect was two more deaths per 1,000 patients; 95% CI, seven fewer to one more).

**ICU admissions.** ICU admissions were not reported.

**Dyspnea scores.** Information regarding dyspnea scores was not complete and could not be pooled.

**Health-related QOL: SGRQ.** Two studies ( $n = 3,538$ ) assessed QOL (33, 34). The studies showed a significant decrease in QOL (increased SGRQ score) between withdrawal of ICS versus continued triple therapy (MD = 1.22; 95% CI, 1.15–1.29;  $P < 0.0001$ ); however, this does not exceed the MCID threshold for an SGRQ score of 4 units.

**Physical activity.** Physical activity was not reported.

**Summary.** Based on the six critical outcomes and completion of the GRADE evidence table, the overall certainty of evidence was judged to be “moderate.”

**Committee discussion.** According to the available evidence, withdrawal of ICS was not associated with a statistically significant difference in risk of pneumonia, all-cause mortality, or risk of COPD exacerbation. The change in QOL did not exceed the MCID threshold. Given the paucity of evidence, and hence the inability to confirm the risks and benefits associated with withdrawal of ICS from triple therapy, and in light of the analysis of data from Population, Intervention, Comparator, and Outcomes (PICO) question 2, which showed that triple therapy is of benefit in patients with a history of exacerbations, the panel suggests that

ICS can be withdrawn and patients can be converted from triple therapy to dual therapy with LABA/LAMA if there is no history of exacerbations in the past year.

#### Question 4: In Patients with COPD and Blood Eosinophilia, Should Treatment Include an ICS in Addition to a Long-Acting Bronchodilator?

**Recommendation.** We do not make a recommendation for or against ICS as an additive therapy to long-acting bronchodilators in patients with COPD and blood eosinophilia (defined as  $\geq 2\%$  blood eosinophils, or  $\geq 150$  cells/ $\mu\text{L}$ ), except for those patients with a history of one or more exacerbations in the past year requiring antibiotics or oral steroids or hospitalization, for whom we suggest ICS as an additive therapy (conditional recommendation, moderate certainty evidence).

**Critical outcomes.** Outcome prioritization by the panel resulted in ranking pneumonia, hospital admissions, exacerbations, dyspnea, and health-related QOL as critical outcomes.

**Summary of the evidence.** The screeners identified eight RCTs ( $n = 9,123$ ) (30, 31, 35–40). The chosen thresholds for the percentage of eosinophils in blood ( $\geq 2\%$  eosinophils) and the number of eosinophils per microliter of blood ( $\geq 150$ ) were based on the values presented in the studies analyzed for the review.

**Pneumonia ( $\geq 2\%$  eosinophils).** Two studies ( $n = 4,131$ ) assessed incidence of pneumonia in patients with  $\geq 2\%$  blood eosinophils (35, 38). The studies revealed an increased risk of pneumonia with an ICS in addition to a long-acting bronchodilator (RR, 1.99; 95% CI, 1.31–3.00;  $P = 0.001$ ). There was moderate certainty in estimates of effect based on GRADE (absolute risk effect was 26 more pneumonias per 1,000 patients; 95% CI, 8 more to 52 more).

**Pneumonia ( $\geq 150$  eosinophils).** Two studies ( $n = 4,267$ ) assessed incidence of pneumonia in patients with  $\geq 150$  blood eosinophils/ $\mu\text{L}$  (36, 38). The studies revealed an increased risk of pneumonia with an ICS in addition to a long-acting bronchodilator (RR, 1.55; 95% CI, 1.23–1.95;  $P < 0.001$ ). There was moderate certainty in estimates of effect based on GRADE (absolute risk effect was 44 more

pneumonias per 1,000 patients; 95% CI, 18 more to 76 more).

**Hospital admissions.** Hospital admissions were not reported.

**Exacerbations ( $\geq 2\%$  eosinophils).** Six studies ( $n = 5,517$ ) assessed rates of COPD exacerbations in patients with  $\geq 2\%$  blood eosinophils (30, 35, 37–40). The studies revealed a reduced risk of exacerbations with an ICS in addition to a long-acting bronchodilator versus a long-acting bronchodilator alone (rate ratio, 0.78; 95% CI, 0.67–0.92;  $P = 0.004$ ). There was moderate certainty in estimates of effect based on GRADE. Assuming a baseline risk of COPD exacerbation in this subgroup of one exacerbation per patient per year, the absolute risk effect was 209 fewer exacerbations per 1,000 patients (95% CI, 313 fewer to 76 fewer).

**Exacerbations ( $\geq 150$  eosinophils/ $\mu\text{l}$ ).** Six studies ( $n = 8,106$ ) assessed rates of COPD exacerbations in patients with  $\geq 150$  blood eosinophils/ $\mu\text{l}$  (30, 31, 36, 38–40). The studies revealed a reduced risk of exacerbations with an ICS in addition to a long-acting bronchodilator versus a long-acting bronchodilator alone (rate ratio, 0.70; 95% CI, 0.59–0.84;  $P < 0.001$ ). There was moderate certainty in estimates of effect based on GRADE. Assuming a baseline risk of COPD exacerbation in this subgroup of one exacerbation per patient per year, the absolute risk effect was 285 fewer exacerbations per 1,000 patients (95% CI, 390 fewer to 152 fewer).

**Dyspnea score: TDI ( $\geq 150$  eosinophils/ $\mu\text{l}$ ).** One study ( $n = 4,269$ ) assessed dyspnea in patients with  $\geq 200$  blood eosinophils/ $\mu\text{l}$  (36). The study revealed no significant difference in dyspnea with an ICS in addition to a long-acting bronchodilator versus a long-acting bronchodilator alone (MD = 0.16; 95% CI, -0.15 to 0.47;  $P = 0.31$ ), and this does not reach the MCID threshold for a TDI of 1 unit.

**Health-related QOL: SGRQ ( $\geq 150$  eosinophils/ $\mu\text{l}$ ).** Two studies assessed QOL ( $n = 4,762$ ) (36, 39). The studies revealed a statistically improved QOL with an ICS in addition to a long-acting bronchodilator versus a long-acting bronchodilator alone (MD = -2.31 units; 95% CI, -3.83 to -0.78;  $P = 0.003$ ); however, this does not exceed the MCID threshold for an SGRQ score of -4 units.

**Summary.** Based on the five critical outcomes and completion of the GRADE evidence table, the overall certainty of evidence was judged to be “moderate.”

**Committee discussion.** According to the available evidence, the addition of ICS to a long-acting bronchodilator in patients with COPD and blood eosinophilia was associated with a significantly increased risk of pneumonia and a significantly decreased risk of exacerbations. Patients with blood eosinophilia treated with ICS plus a long-acting bronchodilator experienced 26–44 more pneumonias per 1,000 patients and 209–285 fewer COPD exacerbations per 1,000 patients.

However, the panel recognized that the studies included within this PICO question analyzed the effects of ICS and a long-acting bronchodilator in patients with elevated blood eosinophils as subgroup analyses, which in many cases were performed *post hoc*. In addition, nonstandardized thresholds were used in the various studies to define “eosinophilia.” Thus, the panel believed the quality of the available studies was not optimal, and hence the committee was reluctant to recommend ICS for all patients with COPD and blood eosinophilia. However, given the weight of the evidence presented for PICO question 2, which shows that ICS are beneficial in patients with a history of exacerbations, the panel believed that patients with blood eosinophilia and a history of exacerbations would likewise benefit from the addition of ICS to a long-acting bronchodilator.

**Question 5: In Patients with COPD Who Have a History of Severe and Frequent Exacerbations despite Otherwise Optimal Therapy, Is Maintenance Oral Steroid Therapy More Effective than and as Safe as No Maintenance Oral Steroid Therapy?**

**Recommendation.** In patients with COPD and a history of severe and frequent exacerbations despite otherwise optimal therapy, we advise against the use of maintenance oral corticosteroid therapy (conditional recommendation, low certainty evidence).

**Critical outcomes.** Outcome prioritization by the panel resulted in ranking mortality, exacerbations, dyspnea, hospital admissions, bone fractures, QOL,

and treatment-emergent adverse events as critical outcomes.

**Summary of the evidence.** The screeners identified four RCTs ( $n = 477$ ) (41–44).

**Mortality.** Two studies ( $n = 241$ ) assessed mortality risk (41, 42). The studies revealed no significant difference in mortality with the use of oral steroid versus no oral steroid (RR, 1.01; 95% CI, 0.28–3.70;  $P = 0.98$ ). There was moderate certainty in estimates of effect based on GRADE (absolute risk effect was 0 fewer per 1,000 patients; 95% CI, 26 fewer to 98 more).

**Exacerbations.** Two studies ( $n = 108$ ) assessed exacerbation risk (42, 43). The studies revealed no significant difference in exacerbations with the use of maintenance oral steroid versus no oral steroid (RR, 1.38; 95% CI, 0.90–2.10;  $P = 0.14$ ). There was moderate certainty in estimates of effect based on GRADE (absolute risk effect was 190 more per 1,000 patients; 95% CI, 50 fewer to 550 more).

**Dyspnea (daily symptom score, visual analog scale).** Two studies ( $n = 142$ ) assessed dyspnea (42, 44). The studies revealed no statistically significant difference in dyspnea with the use of maintenance oral steroids versus no oral steroids (SMD = -0.22; 95% CI, -0.56 to 0.12;  $P = 0.21$ ).

**Hospital admissions.** One study ( $n = 191$ ) assessed the risk of hospital admission (41). The study revealed no significant difference in admissions with the use of oral steroids versus no oral steroids (RR, 0.64; 95% CI, 0.25–1.61;  $P = 0.34$ ). There was moderate certainty in estimates of effect based on GRADE (absolute risk effect was 42 fewer per 1,000 patients; 95% CI, 88 fewer to 71 more).

**Treatment-emergent adverse events.** Two studies ( $n = 247$ ) assessed treatment-emergent adverse events (41, 42). The studies revealed a statistically significant increased risk of adverse events with oral steroid use versus no oral steroids (RR, 1.65; 95% CI, 1.16–2.34;  $P = 0.006$ ). There was low certainty in estimates of effect based on GRADE (absolute risk effect was 174 more per 1,000 patients; 95% CI, 43 more to 359 more).

**Summary.** Based on the five critical outcomes using RCT evidence and completion of the GRADE evidence table, the overall certainty of evidence was judged to be “low.”

**Committee discussion.** The panel believed that maintenance oral steroid therapy has not been shown to improve clinical outcomes, and the available evidence suggests that chronic oral steroid therapy has a potential for harm. Two RCTs revealed an increased risk of adverse events with oral steroid use, suggesting excess harms to patients who are prescribed daily oral steroids. However, this recommendation was based on RCTs with small sample sizes, a small number of events, short durations, and broad CIs around the point estimates. In addition, these studies were done when there was a paucity of medications available for maintenance therapy. The quality of the underlying evidence was poor, and therefore the panel believed that a recommendation in favor of maintenance oral steroid use would be problematic given the concerns surrounding patient safety. The panel also believed that well-informed patients would place a higher value on avoiding the potential harms of adverse events and less value on the uncertain benefits of decreased dyspnea and hospital admissions.

**Question 6: In Patients with COPD Who Experience Advanced Refractory Dyspnea despite Otherwise Optimal Therapy, Is Opioid-based Therapy More Effective than and as Safe as No Additional Therapy?**

**Recommendation.** In individuals with COPD who experience advanced refractory dyspnea despite otherwise optimal therapy, we suggest that opioid-based therapy be considered for dyspnea management within a personalized shared decision-making approach (conditional recommendation, very low certainty evidence).

**Critical outcomes.** Outcome prioritization by the panel resulted in ranking emergency department visits, dyspnea, exacerbations, health-related QOL, falls/accidents, overdose, and exercise capacity as critical outcomes.

**Summary of the evidence.** The screeners identified 14 RCTs for final review inclusion ( $n = 366$ ) (45–58).

**Exacerbations.** One study ( $n = 30$ ) assessed exacerbation risk (52). The study revealed no significant difference in exacerbations between the opioid and no-opioid groups (RR, 1.38; 95% CI, 0.74–2.55;

$P = 0.31$ ). There was low certainty in estimates of effect based on GRADE (absolute risk effect was 190 more exacerbations per 1,000 patients; 95% CI, 130 fewer to 775 more).

**Emergency department visits.** One study ( $n = 30$ ) assessed the risk of emergency department visits (52). The study revealed no significant difference in risk between the opioid and no-opioid groups (RR, 4.41; 95% CI, 0.23–84.79;  $P = 0.33$ ). There was low certainty in estimates of effect based on GRADE (absolute risk effect was 125 more admissions per 1,000 patients; 95% CI, 66 fewer to 316 more per 1,000 patients).

**Falls/accidents.** One study ( $n = 38$ ) with a small sample size assessed the risk of falls/accidents (46). The study revealed no significant difference in risk of falls between the opioid and no-opioid groups (RR, 0.37; 95% CI, 0.02–8.51;  $P = 0.53$ ). There was low certainty in estimates of effect based on GRADE (absolute risk effect was 32 fewer per 1,000 patients; 95% CI, 49 fewer to 376 more).

**Overdose.** One study ( $n = 38$ ) assessed the risk of overdose/oversedation (46). The study revealed no significant difference in risk between the opioid and no-opioid groups (RR, 3.32; 95% CI, 0.14–76.6;  $P = 0.45$ ). There was low certainty in estimates of effect based on GRADE (absolute risk effect was 56 more per 1,000 patients; 95% CI, 82 fewer overdoses per 1,000 patients to 193 more per 1,000 patients).

**Health-related QOL: assessed using a visual analog scale.** One study ( $n = 40$ ) assessed health-related QOL (53). The study revealed a significant difference in the visual analog scale, with an increased score in the group that was randomized to opioids (MD = 1.50; 95% CI, 0.66–2.34;  $P = 0.03$ ), indicating improved QOL.

**Dyspnea: diary cards, visual analog scales, Medical Research Council scale, and Chronic Respiratory Disease Questionnaire dyspnea subscale.** Twelve studies ( $n = 240$ ) assessed dyspnea (45, 46, 48–53, 55–58). The studies revealed a significant difference in dyspnea, favoring the group that received opioids (SMD =  $-0.60$ ; 95% CI,  $-1.08$  to  $-0.13$ ;  $P = 0.01$ ), and this exceeds the MCID threshold. No subgroup differences were noted when systemic versus nebulized administration subgroups were analyzed ( $P = 0.08$ ).

**Exercise capacity.** Nine studies ( $n = 103$ ) assessed exercise capacity (45, 47, 48, 50–55, 57). The studies revealed no significant difference between the opioid and no-opioid groups (SMD = 0.14; 95% CI,  $-1.42$  to 1.70;  $P = 0.86$ ), and this does not reach the MCID threshold. No subgroup differences were noted when systemic versus nebulized administration subgroups were analyzed ( $P = 0.10$ ).

**Summary.** Based on the eight critical outcomes and completion of the GRADE evidence table, the overall certainty of evidence was judged to be “very low.”

**Committee discussion.** The panel noted that in patients with advanced refractory dyspnea, there was a statistically and clinically meaningful improvement in dyspnea with opioid treatment. The panel believed that a conditional recommendation in favor of opioid use was reasonable for dyspnea management given the accumulated evidence, and that well-informed patients might place a higher value on the improvement in dyspnea and less value on the uncertain harms of exacerbations, hospitalizations, falls, or overdoses. The panel believed that the observed benefit in dyspnea outweighed the uncertain risks. However, many of these studies were undertaken when there was a relative paucity of maintenance medications available to treat COPD, and the presumed effects of opioids might differ in today’s clinical context. Therefore, given the very low certainty of evidence, the use of opioids must be evaluated by clinicians and patients in a shared decision-making process.

## Conclusions

In developing this guideline, we performed a rigorous, PICO-driven distillation of the scientific evidence to provide recommendations pertaining to key questions regarding the pharmacologic treatment of COPD. We hope that clinicians and researchers will find this guideline useful; however, it is important to apply these recommendations along with clinical assessments and shared decision-making to ensure that patients receive optimal clinical care. We also recognize that slowing the progression of disease and improving mortality are important goals of therapy; however, pharmacotherapy has not definitely been proven to affect these outcomes.



Improvements in COPD mortality and disease progression have thus far only been achieved through smoking cessation.

The panel recognizes that there are limitations to this clinical practice guideline. The recommendations were based on the available scientific evidence. In many cases, the available clinical trials did not include certain COPD populations, such as patients over 80 years of age, those with chronic comorbid conditions, and those with

COPD/asthma overlap. In addition, the available evidence did not risk stratify patients with exacerbations or those with eosinophilia. It is also important to note that the panel did not include patient representatives or family/caregiver representatives. Their participation might have been important in prioritizing clinical outcomes.

Many questions remain regarding the optimal pharmacologic therapy

for patients with varying risks of exacerbations and levels of eosinophilia, as well as potentially different medication responses among current and former smokers. We hope that the research priorities outlined in this document will prompt new research to identify more specific patient profiles and enable personalized, patient-centered care. ■

This official guideline was prepared by an *ad hoc* subcommittee of the ATS Assembly on Clinical Problems.

#### Members of the subcommittee are as follows:

LINDA NICI, M.D. (*Co-Chair*)<sup>1,2</sup>  
 SHAWN D. AARON, M.D. (*Co-Chair*)<sup>3</sup>  
 PAUL E. ALEXANDER, PH.D.<sup>4\*</sup>  
 DAVID H. AU, M.D.<sup>5,6</sup>  
 CYNTHIA M. BOYD, M.D.<sup>7</sup>  
 EDWARD CHARBEK, M.D.<sup>8\*</sup>  
 GERARD J. CRINER, M.D.<sup>9</sup>  
 GAVIN C. DONALDSON, PH.D.<sup>10</sup>  
 MICHAEL DREHER, M.D.<sup>11</sup>  
 VINCENT S. FAN, M.D.<sup>5,6</sup>  
 ANDREA S. GERSHON, M.D.<sup>12</sup>  
 MEILAN K. HAN, M.D., M.S.<sup>13</sup>  
 JERRY A. KRISHNAN, M.D., PH.D.<sup>14</sup>  
 MANOJ J. MAMMEN, M.D., M.S.<sup>15\*</sup>  
 FERNANDO J. MARTINEZ, M.D.<sup>16</sup>  
 PAULA M. MEEK, R.N., PH.D.<sup>17</sup>  
 MICHAEL MORGAN, M.D.<sup>18</sup>  
 MICHAEL I. POLKEY, PH.D., FRCP<sup>19</sup>  
 MILO A. PUHAN, M.D., PH.D.<sup>20</sup>  
 MOHSEN SADATSAFAVI, M.D., PH.D.<sup>21</sup>  
 DON D. SIN, M.D.<sup>21</sup>  
 GEORGE R. WASHKO, M.D.<sup>22</sup>  
 JADWIGA A. WEDZICHA, M.D.<sup>10</sup>

\*Methodologists.

<sup>1</sup>Providence Veterans Affairs Medical Center, Providence, Rhode Island; <sup>2</sup>The Warren Alpert Medical School of Brown University, Providence, Rhode Island; <sup>3</sup>The Ottawa Hospital Research Institute, University of Ottawa, Ottawa, Ontario, Canada; <sup>4</sup>McMaster University, Hamilton, Ontario, Canada; <sup>5</sup>Veterans Affairs Puget Sound Health Care System, Seattle, Washington; <sup>6</sup>University of Washington, Seattle, Washington; <sup>7</sup>Johns Hopkins University School of Medicine, Baltimore, Maryland; <sup>8</sup>Saint Louis University, St. Louis, Missouri; <sup>9</sup>Lewis Katz School of Medicine, Philadelphia, Pennsylvania; <sup>10</sup>National Heart and Lung Institute, Imperial College, London, United Kingdom; <sup>11</sup>University Hospital Aachen, Rheinisch-Westfälische Technische Hochschule Aachen University, Aachen, Germany; <sup>12</sup>Sunnybrook Health Sciences Centre, University of Toronto, Toronto, Ontario, Canada; <sup>13</sup>University of Michigan,

Ann Arbor, Michigan; <sup>14</sup>University of Illinois, Chicago, Illinois; <sup>15</sup>Jacobs School of Medicine and Biomedical Sciences, University at Buffalo, Buffalo, New York; <sup>16</sup>Cornell University Medical Center, New York, New York; <sup>17</sup>College of Nursing, University of Colorado Anschutz Medical Campus, Denver, Colorado; <sup>18</sup>University Hospitals of Leicester National Health Service Trust, University of Leicester, Leicester, United Kingdom; <sup>19</sup>Royal Brompton & Harefield National Health Service Foundation Trust, London, United Kingdom; <sup>20</sup>Department of Epidemiology, University of Zurich, Zurich, Switzerland; <sup>21</sup>The University of British Columbia, Vancouver, British Columbia, Canada; and <sup>22</sup>Brigham and Women's Hospital, Boston, Massachusetts.

**Author Disclosures:** D.H.A. served as a consultant for Gilead; and on a data and safety monitoring board for Novartis. C.M.B. received author royalties from UpToDate. E.C. served on an advisory committee for Mylan/Theravance. G.J.C. served as a consultant for Ammiral, Bayer, Chiesi, Celerion, Holaira, Mereo, Novartis, Nuvaira, PneumRx, Pulmonetics, Pulmonx, ResMed, and Respironics; received research support from Actelion, Aeris, AstraZeneca, Boehringer Ingelheim, Chiesi, Celerion, Forest, GlaxoSmithKline, Icaria, MedImmune, Mereo, Novartis, Pearl, PneumRx, Pulmonx, ResMed, Respironics, and Spiration; served on an advisory committee for AstraZeneca, Boehringer Ingelheim, and GlaxoSmithKline; and has ownership or investment interests in HGE Health Care Solutions. G.C.D. served as a consultant and received research support from AstraZeneca. M.D. served as a consultant for Ammiral, Boehringer Ingelheim, Hamilton, Linde, Novartis, Pfizer, Philips Respironics, ResMed, and Roche; served as a speaker for Actelion, AstraZeneca, Bayer, Boehringer Ingelheim, Chiesi, Hamilton, Heinen und Löwenstein, InterMune, Linde, Novartis, Pfizer, Philips Respironics, ResMed, and Roche; received research support from Philips Respironics and ResMed; and received personal fees from Berlin Chemie and GlaxoSmithKline. M.K.H. served as a consultant for AstraZeneca, Boehringer

Ingelheim, GlaxoSmithKline, Merck, and Mylan; served on a data and safety monitoring board for Novartis; served as a speaker for Novartis; and received research support from Novartis and Sunovion. J.A.K. served on a data safety and monitoring board for Sanofi; served as a speaker for Philips; and received research support from Inogen, PCORI, and ResMed. M.J.M. received research support from GlaxoSmithKline and Sanofi. F.J.M. served on an advisory committee for AstraZeneca, Boehringer Ingelheim, CSL Behring, Gala, Genentech, GlaxoSmithKline, Merck, Novartis, Pearl, Veracyte, and Zambon; served as a consultant for AstraZeneca, Boehringer Ingelheim, Bridge Biotherapeutics, Bristol Myers Squibb, Chiesi, Genentech, GlaxoSmithKline, Patara/Respivent, ProTERRIXBio, Sunovion, Teva, and TwoXR; served on a data safety and monitoring board for Biogen, Boehringer Ingelheim, Genentech, and GlaxoSmithKline; served as a speaker for Boehringer Ingelheim, CME Outfitters, France Foundation, MD Magazine, Miller Communications, National Association for Continuing Education, Novartis, PeerView, Physicians Education Resource, Prime Education, Rare Diseases Healthcare Communications, Rockpointe, Vindico, and WebMD/MedScape; received research support from AstraZeneca, Bayer, Biogen, Boehringer Ingelheim, Gilead, GlaxoSmithKline, Nitto, Patara/Respivent, Promedior, ProMetic, ProTERRIXBio, Veracyte, Verona, and Zambon; and received author royalties from UpToDate. M.I.P. served as a consultant for GlaxoSmithKline and Philips Respironics; and received research support from GlaxoSmithKline. M.S. served as a speaker for AstraZeneca, Boehringer Ingelheim, and GlaxoSmithKline; and received research support from AstraZeneca and GlaxoSmithKline. D.D.S. served as a speaker for Boehringer Ingelheim; and received research support from AstraZeneca and IKOMED. G.R.W. served on an advisory committee for Boehringer Ingelheim, CSL Behring, GlaxoSmithKline, and Vertex; served as a consultant for Boehringer Ingelheim, CSL Behring, Janssen, Novartis,

PulmonX, and Vertex; served on a data and safety monitoring board for PulmonX; received research support from Boehringer Ingelheim, BTG, and Janssen; has ownership and investment interest in Quantitative Image Solutions; and his spouse is an employee of

Biogen. J.A.W. served as a speaker for Medscape; served on a data and safety monitoring board for Virtus Respiratory Research; received research support from AstraZeneca, Boehringer Ingelheim, Chiesi, Genentech, GlaxoSmithKline, Johnson &

Johnson, and Novartis; and received travel support from AstraZeneca, Boehringer Ingelheim, Cipla, and Novartis. L.N., S.D.A., P.E.A., V.S.F., A.S.G., P.M.M., M.M., and M.A.P. reported no relevant commercial relationships.

## References

- Global Initiative for Chronic Obstructive Lung Disease. Global strategy for the diagnosis, management, and prevention of chronic obstructive pulmonary disease; 2019 [accessed 2019 Nov 12]. Available from: <https://goldcopd.org/wp-content/uploads/2018/11/GOLD-2019-v1.7-FINAL-14Nov2018-WMS.pdf>.
- Andrews JC, Schünemann HJ, Oxman AD, Pottie K, Meerpohl JJ, Coello PA, et al. GRADE guidelines: 15. Going from evidence to recommendation—determinants of a recommendation's direction and strength. *J Clin Epidemiol* 2013;66:726–735.
- Li S-A, Alexander PE, Reljic T, Cuker A, Nieuwlaat R, Wiercioch W, et al. Evidence to decision framework provides a structured “roadmap” for making GRADE guideline recommendations. *J Clin Epidemiol* 2018;104:103–112.
- Norman GR, Sloan JA, Wyrwich KW. Interpretation of changes in health-related quality of life: the remarkable universality of half a standard deviation. *Med Care* 2003;41:582–592.
- Celli B, Crater G, Kilbride S, Mehta R, Tabberer M, Kalberg CJ, et al. Once-daily umeclidinium/vilanterol 125/25 mcg in COPD: a randomized, controlled study. *Chest* 2014;145:981–991.
- Tashkin DP, Donohue JF, Mahler DA, Huang H, Goodwin E, Schaefer K, et al. Effects of arformoterol twice daily, tiotropium once daily, and their combination in patients with COPD. *Respir Med* 2009;103:516–524.
- Mahler DA, Kerwin E, Ayers T, FowlerTaylor A, Maitra S, Thach C, et al. FLIGHT1 and FLIGHT2: efficacy and safety of QVA149 (indacaterol/glycopyrrolate) versus its monocomponents and placebo in patients with chronic obstructive pulmonary disease. *Am J Respir Crit Care Med* 2015;192:1068–1079.
- Maltais F, Singh S, Donald AC, Crater G, Church A, Goh AH, et al. Effects of a combination of umeclidinium/vilanterol on exercise endurance in patients with chronic obstructive pulmonary disease: two randomized, double-blind clinical trials. *Thorax* 2014;8:169–181.
- D'Urzo A, Rennard S, Kerwin E, Donohue JF, Lei A, Molins E, et al. A randomized double-blind, placebo-controlled, long-term extension study of the efficacy, safety and tolerability of fixed-dose combinations of aclidinium/formoterol or monotherapy in the treatment of chronic obstructive pulmonary disease. *Respir Med* 2017;125:39–48.
- Singh D, Jones PW, Bateman ED, Korn S, Serra C, Molins E, et al. Efficacy and safety of aclidinium bromide/formoterol fumarate fixed-dose combinations compared with individual components and placebo in patients with COPD (ACLIFORM-COPD): a multicentre, randomised study. *BMC Pulm Med* 2014;14:178.
- Martinez FJ, Rabe KF, Ferguson GT, Fabbri LM, Rennard S, Feldman GJ, et al. Efficacy and safety of glycopyrrolate/formoterol metered dose inhaler formulated using co-suspension delivery technology in patients with COPD. *Chest* 2017;151:340–357.
- Hanania NA, Tashkin DP, Kerwin EM, Donohue JF, Denenberg M, O'Donnell DE, et al. Long-term safety and efficacy of glycopyrrolate/formoterol metered dose inhaler using novel Co-Suspension™ Delivery Technology in patients with chronic obstructive pulmonary disease. *Respir Med* 2017;126:105–115.
- Donohue JF, Soong W, Wu X, Shrestha P, Lei A. Long-term safety of aclidinium bromide/formoterol fumarate fixed-dose combination: results of a randomized 1-year trial in patients with COPD. *Respir Med* 2016;116:41–48.
- Maleki-Yazdi MR, Kaelin T, Richard N, Zvarich M, Church A. Efficacy and safety of umeclidinium/vilanterol 62.5/25 mcg and tiotropium 18 mcg in chronic obstructive pulmonary disease: results of a 24-week, randomized, controlled trial. *Respir Med* 2014;108:1752–1760.
- Singh D, Ferguson GT, Bolitschek J, Grönke L, Hallmann C, Bennett N, et al. Tiotropium + olodaterol shows clinically meaningful improvements in quality of life. *Respir Med* 2015;109:1312–1319.
- Buhl R, Maltais F, Abrahams R, Bjermer L, Derom E, Ferguson G, et al. Tiotropium and olodaterol fixed-dose combination versus mono-components in COPD (GOLD 2-4). *Eur Respir J* 2015;45:969–979.
- Bateman ED, Ferguson GT, Barnes N, Gallagher N, Green Y, Henley M, et al. Dual bronchodilation with QVA149 versus single bronchodilator therapy: the SHINE study. *Eur Respir J* 2013;42:1484–1494.
- Wedzicha JA, Decramer M, Ficker JH, Niewoehner DE, Sandström T, Taylor AF, et al. Analysis of chronic obstructive pulmonary disease exacerbations with the dual bronchodilator QVA149 compared with glycopyrronium and tiotropium (SPARK): a randomised, double-blind, parallel-group study. *Lancet Respir Med* 2013;1:199–209.
- Aaron SD, Vandemheen KL, Fergusson D, Maltais F, Bourbeau J, Goldstein R, et al.; Canadian Thoracic Society/Canadian Respiratory Clinical Research Consortium. Tiotropium in combination with placebo, salmeterol, or fluticasone-salmeterol for treatment of chronic obstructive pulmonary disease: a randomized trial. *Ann Intern Med* 2007;146:545–555.
- Kerwin EM, Kalberg CJ, Galkin DV, Zhu C-Q, Church A, Riley JH, et al. Umeclidinium/vilanterol as step-up therapy from tiotropium in patients with moderate COPD: a randomized, parallel-group, 12-week study. *Int J Chron Obstruct Pulmon Dis* 2017;12:745–755.
- Ferguson GT, Taylor AF, Thach C, Wang Q, Schubert-Tennigkeit AA, Patalano F, et al. Long-term maintenance bronchodilation with indacaterol/glycopyrrolate versus indacaterol in moderate-to-severe COPD patients: the FLIGHT 3 study. *Chronic Obstr Pulm Dis (Miami)* 2016;3:716–728.
- Donohue JF, Maleki-Yazdi MR, Kilbride S, Mehta R, Kalberg C, Church A. Efficacy and safety of once-daily umeclidinium/vilanterol 62.5/25 mcg in COPD. *Respir Med* 2013;107:1538–1546.
- Vogelmeier C, Kardos P, Harari S, Gans SJM, Stenglein S, Thirlwell J. Formoterol mono- and combination therapy with tiotropium in patients with COPD: a 6-month study. *Respir Med* 2008;102:1511–1520.
- ZuWallack R, Allen L, Hernandez G, Ting N, Abrahams R. Efficacy and safety of combining olodaterol Respimat® and tiotropium HandiHaler® in patients with COPD: results of two randomized, double-blind, active-controlled studies. *Int J Chron Obstruct Pulmon Dis* 2014;9:1133–1144.
- Vincken W, Aumann J, Chen H, Henley M, McBryan D, Goyal P. Efficacy and safety of coadministration of once-daily indacaterol and glycopyrronium versus indacaterol alone in COPD patients: the GLOW6 study. *Int J Chron Obstruct Pulmon Dis* 2014;9:215–228.
- Calverley PMA, Anzueto AR, Carter K, Grönke L, Hallmann C, Jenkins C, et al. Tiotropium and olodaterol in the prevention of chronic obstructive pulmonary disease exacerbations (DYNAGITO): a double-blind, randomised, parallel-group, active-controlled trial. *Lancet Respir Med* 2018;6:337–344.
- Decramer M, Anzueto A, Kerwin E, Kaelin T, Richard N, Crater G, et al. Efficacy and safety of umeclidinium plus vilanterol versus tiotropium, vilanterol, or umeclidinium monotherapies over 24 weeks in patients with chronic obstructive pulmonary disease: results from two multicentre, blinded, randomised controlled trials. *Lancet Respir Med* 2014;2:472–486.
- Mahler DA, D'Urzo A, Bateman ED, Özkan SA, White T, Peckitt C, et al.; INTRUST-1 and INTRUST-2 study investigators. Concurrent use of indacaterol plus tiotropium in patients with COPD provides superior bronchodilation compared with tiotropium alone: a randomised, double-blind comparison. *Thorax* 2012;67:781–788.

29. Lipson DA, Barnhart F, Brealey N, Brooks J, Criner GJ, Day NC, *et al.*; IMPACT Investigators. Once-daily single-inhaler triple versus dual therapy in patients with COPD. *N Engl J Med* 2018;378: 1671–1680.
30. Papi A, Vestbo J, Fabbri L, Corradi M, Prunier H, Cohuet G, *et al.* Extrafine inhaled triple therapy versus dual bronchodilator therapy in chronic obstructive pulmonary disease (TRIBUTE): a double-blind, parallel group, randomised controlled trial. *Lancet* 2018;391: 1076–1084.
31. Ferguson GT, Rabe KF, Martinez FJ, Fabbri LM, Wang C, Ichinose M, *et al.* Triple therapy with budesonide/glycopyrrolate/formoterol fumarate with co-suspension delivery technology versus dual therapies in chronic obstructive pulmonary disease (KRONOS): a double-blind, parallel-group, multicentre, phase 3 randomised controlled trial. *Lancet Respir Med* 2018;6:747–758.
32. Watz H, Tetzlaff K, Wouters EFM, Kirsten A, Magnussen H, Rodriguez-Roisin R, *et al.* Blood eosinophil count and exacerbations in severe chronic obstructive pulmonary disease after withdrawal of inhaled corticosteroids: a *post-hoc* analysis of the WISDOM trial. *Lancet Respir Med* 2016;4:390–398.
33. Magnussen H, Disse B, Rodriguez-Roisin R, Kirsten A, Watz H, Tetzlaff K, *et al.*; WISDOM Investigators. Withdrawal of inhaled glucocorticoids and exacerbations of COPD. *N Engl J Med* 2014; 371:1285–1294.
34. Chapman KR, Hurst JR, Frent S-M, Larbig M, Fogel R, Guerin T, *et al.* Long-Term triple therapy de-escalation to indacaterol/glycopyrronium in patients with chronic obstructive pulmonary disease (SUNSET): a randomized, double-blind, triple-dummy clinical trial. *Am J Respir Crit Care Med* 2018;198:329–339.
35. Pascoe S, Locantore N, Dransfield MT, Barnes NC, Pavord ID. Blood eosinophil counts, exacerbations, and response to the addition of inhaled fluticasone furoate to vilanterol in patients with chronic obstructive pulmonary disease: a secondary analysis of data from two parallel randomised controlled trials. *Lancet Respir Med* 2015;3: 435–442.
36. Pascoe S, Barnes N, Brusselle G, Compton C, Criner GJ, Dransfield MT, *et al.* Blood eosinophils and treatment response with triple and dual combination therapy in chronic obstructive pulmonary disease: analysis of the IMPACT trial. *Lancet Respir Med* 2019;7: 745–756.
37. Pavord ID, Lettis S, Locantore N, Pascoe S, Jones PW, Wedzicha JA, *et al.* Blood eosinophils and inhaled corticosteroid/long-acting  $\beta$ -2 agonist efficacy in COPD. *Thorax* 2016;71:118–125.
38. Roche N, Chapman KR, Vogelmeier CF, Herth FJF, Thach C, Fogel R, *et al.* Blood eosinophils and response to maintenance chronic obstructive pulmonary disease treatment. Data from the FLAME trial. *Am J Respir Crit Care Med* 2017;195:1189–1197.
39. Siddiqui SH, Guasconi A, Vestbo J, Jones P, Agusti A, Paggiaro P, *et al.* Blood eosinophils: a biomarker of response to extrafine beclomethasone/formoterol in chronic obstructive pulmonary disease. *Am J Respir Crit Care Med* 2015;192:523–525.
40. Vestbo J, Papi A, Corradi M, Blazhko V, Montagna I, Francisco C, *et al.* Single inhaler extrafine triple therapy versus long-acting muscarinic antagonist therapy for chronic obstructive pulmonary disease (TRINITY): a double-blind, parallel group, randomised controlled trial. *Lancet* 2017;389:1919–1929.
41. Niewoehner DE, Erbland ML, Deupree RH, Collins D, Gross NJ, Light RW, *et al.*; Department of Veterans Affairs Cooperative Study Group. Effect of systemic glucocorticoids on exacerbations of chronic obstructive pulmonary disease. *N Engl J Med* 1999;340: 1941–1947.
42. Davies L, Nisar M, Pearson MG, Costello RW, Earis JE, Calverley PMA. Oral corticosteroid trials in the management of stable chronic obstructive pulmonary disease. *QJM* 1999;92:395–400.
43. Renkema TEJ, Schouten JP, Koëter GH, Postma DS. Effects of long-term treatment with corticosteroids in COPD. *Chest* 1996;109: 1156–1162.
44. Weir DC, Burge PS. Effects of high dose inhaled beclomethasone dipropionate, 750 micrograms and 1500 micrograms twice daily, and 40 mg per day oral prednisolone on lung function, symptoms, and bronchial hyperresponsiveness in patients with non-asthmatic chronic airflow obstruction. *Thorax* 1993;48:309–316.
45. Light RW, Muro JR, Sato RI, Stansbury DW, Fischer CE, Brown SE. Effects of oral morphine on breathlessness and exercise tolerance in patients with chronic obstructive pulmonary disease. *Am Rev Respir Dis* 1989;139:126–133.
46. Abernethy AP, Currow DC, Frith P, Fazekas BS, McHugh A, Bui C. Randomised, double blind, placebo controlled crossover trial of sustained release morphine for the management of refractory dyspnoea. *BMJ* 2003;327:523–528.
47. Beauford W, Saylor TT, Stansbury DW, Avalos K, Light RW. Effects of nebulized morphine sulfate on the exercise tolerance of the ventilatory limited COPD patient. *Chest* 1993;104:175–178.
48. Eiser N, Denman WT, West C, Luce P. Oral diamorphine: lack of effect on dyspnoea and exercise tolerance in the “pink puffer” syndrome. *Eur Respir J* 1991;4:926–931.
49. Jankelson D, Hosseini K, Mather LE, Seale JP, Young IH. Lack of effect of high doses of inhaled morphine on exercise endurance in chronic obstructive pulmonary disease. *Eur Respir J* 1997;10: 2270–2274.
50. Leung R, Hill P, Burdon J. Effect of inhaled morphine on the development of breathlessness during exercise in patients with chronic lung disease. *Thorax* 1996;51:596–600.
51. Light RW, Stansbury DW, Webster JS. Effect of 30 mg of morphine alone or with promethazine or prochlorperazine on the exercise capacity of patients with COPD. *Chest* 1996;109:975–981.
52. Poole PJ, Veale AG, Black PN. The effect of sustained-release morphine on breathlessness and quality of life in severe chronic obstructive pulmonary disease. *Am J Respir Crit Care Med* 1998; 157:1877–1880.
53. Shohrati M, Ghanei M, Harandi AA, Foroghi S, Harandi AA. Effect of nebulized morphine on dyspnea of mustard gas-exposed patients: a double-blind randomized clinical trial study. *Pulm Med* 2012;2012: 610921.
54. Young IH, Daviskas E, Keena VA. Effect of low dose nebulised morphine on exercise endurance in patients with chronic lung disease. *Thorax* 1989;44:387–390.
55. Jensen D, Alshail A, Viola R, Dudgeon DJ, Webb KA, O'Donnell DE. Inhaled fentanyl citrate improves exercise endurance during high-intensity constant work rate cycle exercise in chronic obstructive pulmonary disease. *J Pain Symptom Manage* 2012;43:706–719.
56. Nosedá A, Carpiaux JP, Markstein C, Meyvaert A, de Maertelaer V. Disabling dyspnoea in patients with advanced disease: lack of effect of nebulized morphine. *Eur Respir J* 1997;10:1079–1083.
57. Woodcock AA, Gross ER, Gellert A, Shah S, Johnson M, Geddes DM. Effects of dihydrocodeine, alcohol, and caffeine on breathlessness and exercise tolerance in patients with chronic obstructive lung disease and normal blood gases. *N Engl J Med* 1981;305: 1611–1616.
58. Johnson MA, Woodcock AA, Geddes DM. Dihydrocodeine for breathlessness in “pink puffers”. *Br Med J (Clin Res Ed)* 1983;286: 675–677.
